# Supplementary material for: Revisiting IgG Antibody Reactivity to Epstein-Barr Virus in Myalgic Encephalomyelitis/Chronic Fatigue Syndrome and Its Potential Application to Disease Diagnosis
Source: PubMed Central journal article supplement (PMC9263839; doi:10.3389/fmed.2022.921101), 2022-06-24

## Supplementary Table 1

The overall and per-EBV-strain number of 15-mer peptides (antigens) whose antibody responses analysed.

| EBV Protein | Associated stage       | Number of 15-mer peptides per EBV strain |       |       |     |     |      |        |
|-------------|------------------------|------------------------------------------|-------|-------|-----|-----|------|--------|
|             |                        | Overall                                  | AG876 | B95.8 | GD1 | Cao | Raji | P3HR.1 |
| BALF-2      | Early lytic            | 290                                      | 278   | 278   | 278 | 0   | 0    | 0      |
| BALF-5      | Early lytic            | 256                                      | 250   | 250   | 250 | 0   | 0    | 0      |
| BFRF-3      | Late lytic             | 42                                       | 0     | 42    | 0   | 0   | 0    | 0      |
| BLLF-1      | Late lytic             | 273                                      | 204   | 202   | 199 | 0   | 0    | 204    |
| BLLF-3      | Early lytic            | 74                                       | 66    | 67    | 66  | 0   | 0    | 0      |
| BLRF-2      | Late lytic             | 41                                       | 38    | 38    | 38  | 0   | 0    | 0      |
| BMRF-1      | Early lytic            | 102                                      | 99    | 99    | 99  | 0   | 0    | 0      |
| BZLF-1      | Immediate early lytic  | 89                                       | 57    | 57    | 58  | 0   | 0    | 0      |
| EBNA-1      | Latency I, II, and III | 182                                      | 98    | 107   | 111 | 0   | 0    | 0      |
| EBNA-3      | Latency III            | 446                                      | 223   | 226   | 224 | 0   | 0    | 0      |
| EBNA-4      | Latency III            | 469                                      | 229   | 221   | 224 | 0   | 0    | 0      |
| EBNA-6      | Latency III            | 461                                      | 254   | 234   | 230 | 0   | 0    | 0      |
| LMP-1       | Latency II and III     | 197                                      | 79    | 85    | 80  | 77  | 84   | 0      |
| LMP-2       | Latency II and III     | 132                                      | 120   | 120   | 120 | 0   | 0    | 0      |

## Supplementary Table 2

Comparison among different null models (including the covariates age and gender and their interaction) using the Akaike's information criterion (AIC). The best model for each analysis/comparison is shown in bold. ME/CFS\_all, ME/CFS\_inf and ME/CFS\_noninf represent all the ME/CFS patients, ME/CFS patients with an infectious trigger, and ME/CFS patients with a non-infectious trigger, respectively.

| Analysis/Comparison               | Model (Link function)        | AIC            | ROC (95% CI)               |
|-----------------------------------|------------------------------|----------------|----------------------------|
| ME/CFS_all vs Healthy Controls    | Logit                        | 189.973        | 0.577 (0.478;0.676)        |
|                                   | Probit                       | 189.964        | 0.576 (0.478;0.675)        |
|                                   | <b>Complementary log-log</b> | <b>189.936</b> | <b>0.574 (0.475;0.672)</b> |
| ME/CFS_inf vs Healthy Controls    | Logit                        | 147.055        | 0.610 (0.500;0.719)        |
|                                   | <b>Probit</b>                | <b>147.029</b> | <b>0.606 (0.496;0.715)</b> |
|                                   | Complementary log-log        | 147.220        | 0.609 (0.499;0.718)        |
| ME/CFS_noninf vs Healthy Controls | Logit                        | 127.619        | 0.556 (0.429;0.683)        |
|                                   | Probit                       | 127.629        | 0.559 (0.432;0.687)        |
|                                   | <b>Complementary log-log</b> | <b>127.547</b> | <b>0.556 (0.429;0.683)</b> |
| ME/CFS_inf vs ME/CFS_noninf       | <b>Logit</b>                 | <b>129.205</b> | <b>0.596 (0.471;0.720)</b> |
|                                   | Probit                       | 129.236        | 0.597 (0.472;0.721)        |
|                                   | Complementary log-log        | 129.529        | 0.596 (0.472;0.721)        |

### Supplementary Table 3

The top 5 most significant antibodies for each association analysis where ME/CFS\_all, ME/CFS\_inf and ME/CFS\_noninf represent all ME/CFS patients, ME/CFS patients with an infectious trigger, and ME/CFS patients with a non-infectious trigger, respectively. For simplicity, the antibodies were identified by their peptide. Statistically significant findings were obtained for  $-\log_{10}(\text{adjusted p-value}) > 1.30$  ( $=-\log_{10}(0.05)$ ) controlling for false discovery rate of 5% using the Benjamini-Yekutieli procedure.

| Analysis/Comparison               | Peptide    | $-\log_{10}(\text{adjusted p-value})$ |
|-----------------------------------|------------|---------------------------------------|
| ME/CFS_all vs Healthy controls    | EBNA6_0066 | 0.743                                 |
|                                   | BLRF2_0005 | 0.486                                 |
|                                   | EBNA4_0392 | 0.486                                 |
|                                   | EBNA4_0497 | 0.486                                 |
|                                   | EBNA4_0529 | 0.486                                 |
| ME/CFS_inf vs Healthy controls    | EBNA6_0066 | 2.693                                 |
|                                   | EBNA6_0070 | 2.693                                 |
|                                   | EBNA4_0529 | 1.794                                 |
|                                   | EBNA3_0380 | 1.270                                 |
|                                   | EBNA6_0569 | 1.270                                 |
| ME/CFS_noninf vs Healthy controls | EBNA6_0782 | 1.193                                 |
|                                   | BALF2_0358 | 1.153                                 |
|                                   | BALF2_0765 | 1.153                                 |
|                                   | BALF5_0041 | 1.153                                 |
|                                   | BALF5_0206 | 1.153                                 |

## Supplementary Figure 1

Distributions of the Spearman's correlation coefficient between all the possible pairs of EBV-derived antibodies in healthy controls, all the ME/CFS patients, ME/CFS patients with an infectious trigger, and ME/CFS patients with a non-infectious or unknown trigger.

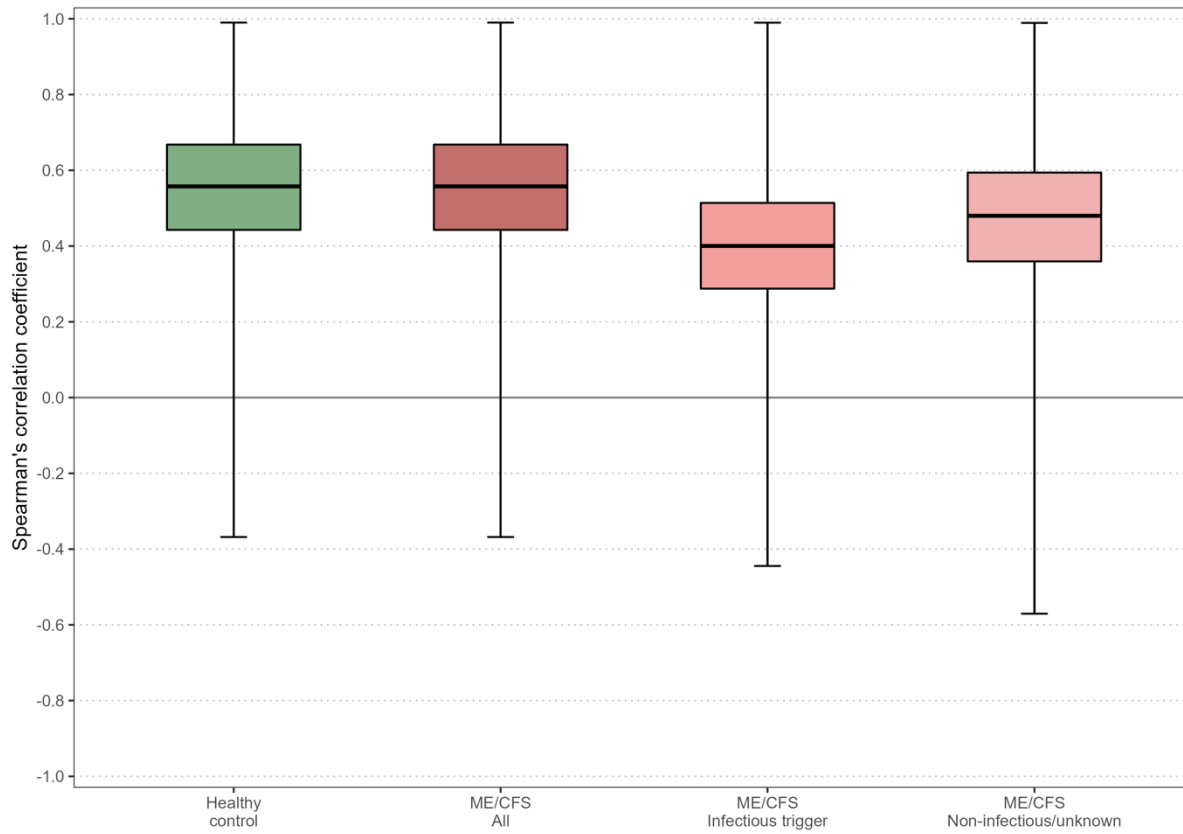

Supplement: Data_Sheet_1.pdf [file Data_Sheet_1.pdf]
